# Supplementary material for: Hybrid Assembly Improves Genome Quality and Completeness of Trametes villosa CCMB561 and Reveals a Huge Potential for Lignocellulose Breakdown
Source: MDPI journal article supplement (doi:10.3390/jof8020142), 2022-01-30
Supplement: s1 [file s1]

*Trametes villosa*  
(genome.fasta)

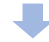

MAKER

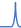

MAKER  
(ROUND1)

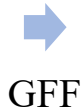

GFF

MAKER  
(ROUND2)

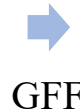

GFF

MAKER  
(ROUND3)

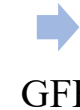

GFF

MAKER  
(ROUND4)

Protein

EST

tRNAscan-SE

SNAP  
(HMM file)

Augustus

GeneMark  
(HMM file)

SNAP  
(HMM File)

Augustus

PROTEINS, TRANSCRIPTS AND GFF FILE

ASSIGNMENT OF GENE FUNCTION

GENE ONTOLOGY ANALYSIS (GOfeat.)
