# Supplementary material for: Hybrid Assembly Improves Genome Quality and Completeness of Trametes villosa CCMB561 and Reveals a Huge Potential for Lignocellulose Breakdown
Source: MDPI journal article supplement (doi:10.3390/jof8020142), 2022-01-30
Supplement: s1 [file s1]

## GenomeScope Profile

len:44,895,640bp uniq:83.6%  
aa:97.4% ab:2.59%  
kcov:50.7 err:0.0742% dup:0.9 k:21 p:2

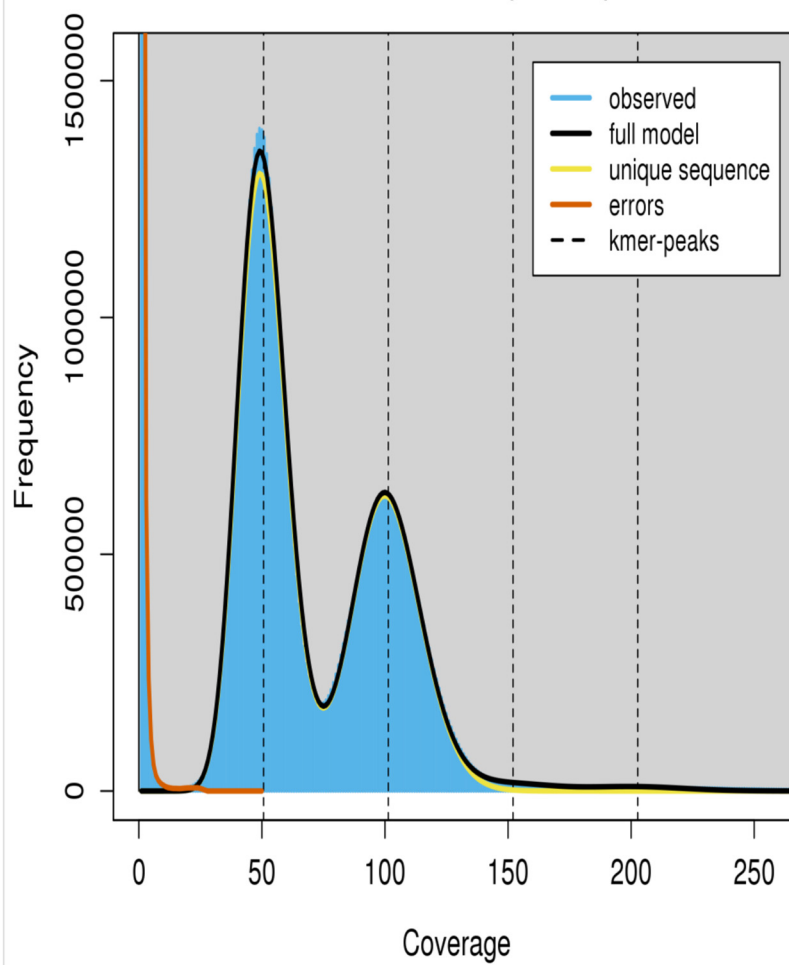

```
GenomeScope version 2.0
input file = user_uploads/3ZGtdEQ9yidRAYrvKddc
output directory = user_data/3ZGtdEQ9yidRAYrvKddc
p = 2
k = 21
```

| property              | min           | max           |
|-----------------------|---------------|---------------|
| Homozygous (aa)       | 97.3963%      | 97.4139%      |
| Heterozygous (ab)     | 2.58608%      | 2.60366%      |
| Genome Haploid Length | 44,851,312 bp | 44,895,640 bp |
| Genome Repeat Length  | 7,349,356 bp  | 7,356,619 bp  |
| Genome Unique Length  | 37,501,956 bp | 37,539,020 bp |
| Model Fit             | 85.8514%      | 95.4174%      |
| Read Error Rate       | 0.0741602%    | 0.0741602%    |

## Model

```
Formula: y_transform ~ x^transform_exp * length * predict2_0(r1, k, d,
  kmercov, bias, x)
```

Parameters:

|         | Estimate  | Std. Error | t value | Pr(> t )   |
|---------|-----------|------------|---------|------------|
| d       | 3.485e-02 | 8.608e-04  | 40.48   | <2e-16 *** |
| r1      | 2.595e-02 | 4.396e-05  | 590.34  | <2e-16 *** |
| kmercov | 5.067e+01 | 1.251e-02  | 4049.23 | <2e-16 *** |
| bias    | 9.004e-01 | 5.090e-03  | 176.89  | <2e-16 *** |
| length  | 3.888e+07 | 4.836e+04  | 803.84  | <2e-16 *** |

---

Signif. codes: 0 '\*\*\*' 0.001 '\*\*' 0.01 '\*' 0.05 '.' 0.1 ' ' 1

Residual standard error: 448900 on 1995 degrees of freedom

Number of iterations to convergence: 6

Achieved convergence tolerance: 1.49e-08
