# Supplementary figures and images for: Hybrid Assembly Improves Genome Quality and Completeness of Trametes villosa CCMB561 and Reveals a Huge Potential for Lignocellulose Breakdown
Source: MDPI journal article supplement (doi:10.3390/jof8020142), 2022-01-30

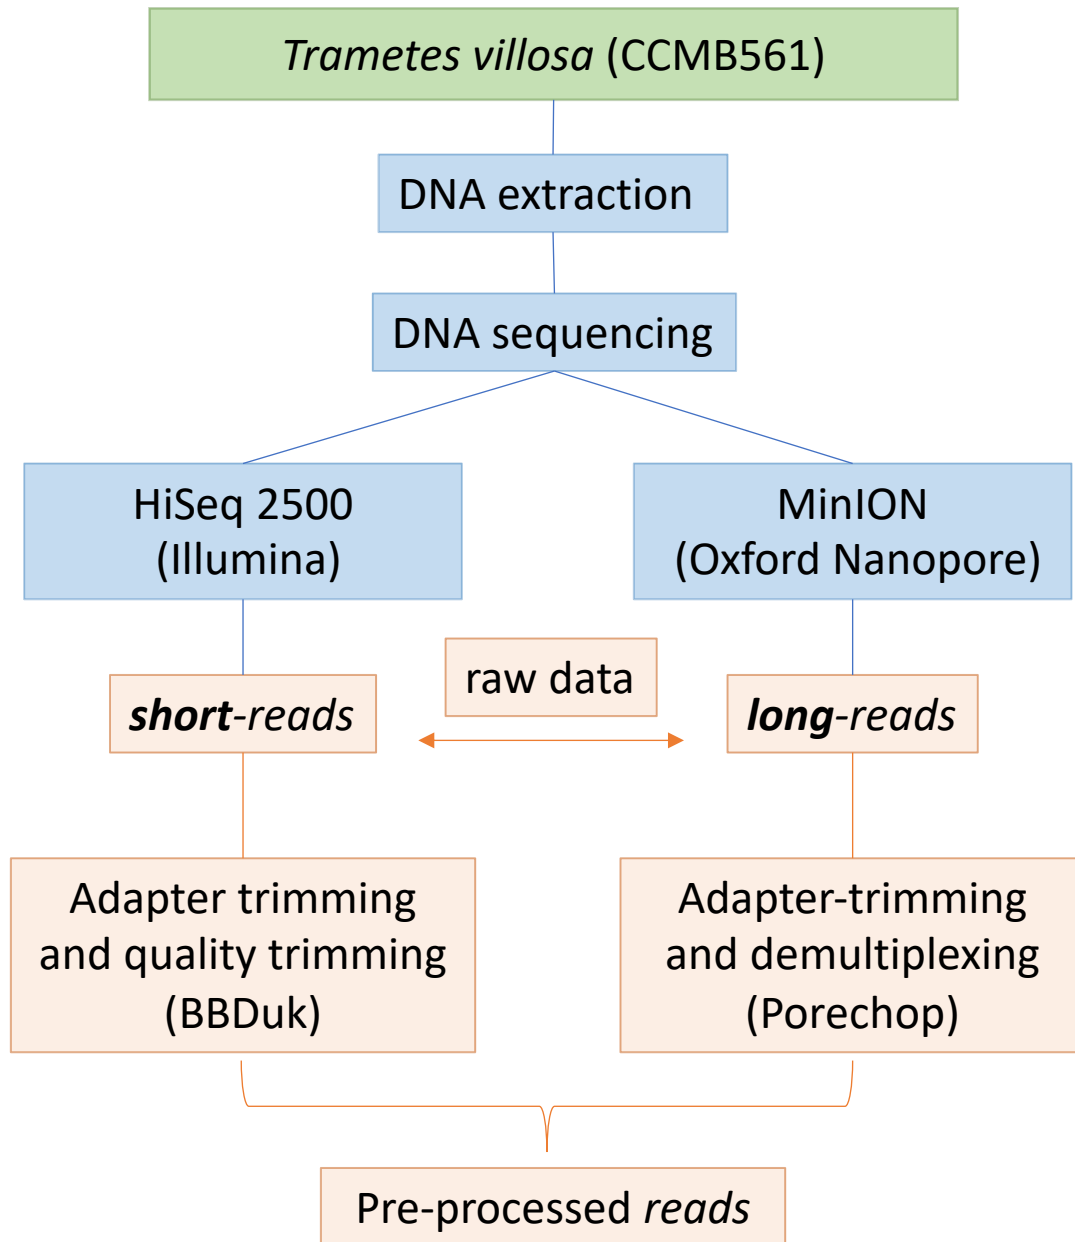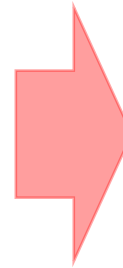

Software used in the assembly

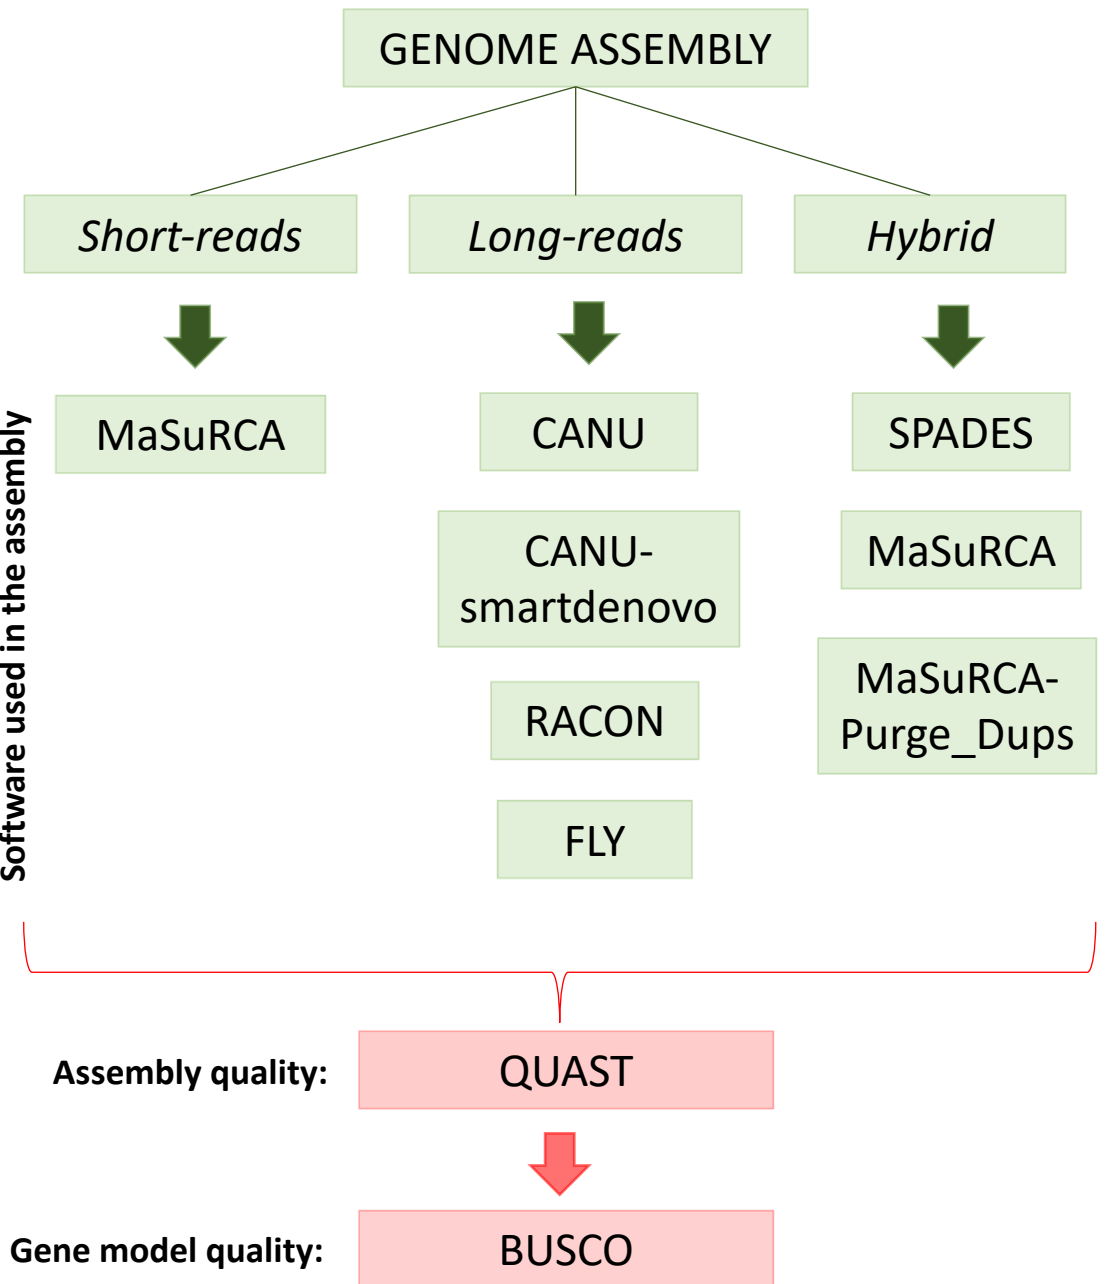

Supplement: s1 [file s1]
